# Supplementary material for: Assessment of Perfusion Volumes by a New Automated Software for Computed Tomography Perfusion
Source: HighWire-hosted journal article supplement (doi:10.1136/svn-2023-002964), 2024-03-28
Supplement: svn-2023-002964supp001_data_supplement.pdf [file svn-2023-002964supp001_data_supplement.pdf]

**Supplement Table 1. Agreement of hypoperfused areas and infarct core volume****on automated software in all patients**

|                                                              | <b>RAPID</b>               | <b>iStroke</b>     | <b>Rho</b>        | <b>P</b> |
|--------------------------------------------------------------|----------------------------|--------------------|-------------------|----------|
|                                                              | <b>(N = 326)</b>           | <b>(N = 326)</b>   |                   |          |
| <b>Anterior circulation large vessel occlusion (N = 297)</b> |                            |                    |                   |          |
| Tmax >6s                                                     | 142.0 (93.0-190.5)         | 140.7 (86.0-186.1) | 0.65 <sup>a</sup> | <0.001   |
| CBF <30%                                                     | 8.0 (0.0-25.5)             | 24.4 (9.9-38.2)    | 0.65 <sup>a</sup> | <0.001   |
| <b>Posterior circulation large vessel occlusion (N = 29)</b> |                            |                    |                   |          |
| Tmax >6s                                                     | 23.0 (0.0-101.5)           | 0.0 (0.0-74.8)     | 0.40 <sup>a</sup> | 0.032    |
| CBF <30%                                                     | 0.0 (0.0-0.0) <sup>b</sup> | 0.0 (0.0-9.6)      | 0.54 <sup>a</sup> | 0.002    |

a. Spearman's rank correlation

b. The range of CBF <30% was 0.0-29.0 mL in patients with posterior circulation large vessel occlusion in the RAPID software.

**Supplement Table 2. Correlation of infarct core volume on automated software and ground truth in patients with DWI**

|                                                              | <b>CTP core volumes</b>    | <b>Ground truth</b> | <b>Rho</b>          | <b>P</b> |
|--------------------------------------------------------------|----------------------------|---------------------|---------------------|----------|
|                                                              | <b>(N = 228)</b>           | <b>(N = 228)</b>    |                     |          |
| <b>Anterior circulation large vessel occlusion (N = 202)</b> |                            |                     |                     |          |
| iStroke infarct core volume                                  | 20.7 (6.9-34.8)            | 24.9 (12.3-54.6)    | 0.43 <sup>a</sup>   | <0.001   |
| RAPID infarct core volume                                    | 6.0 (0.0-22.0)             | 24.9 (12.3-54.6)    | 0.65 <sup>a</sup>   | <0.001   |
| <b>Posterior circulation large vessel occlusion (N = 26)</b> |                            |                     |                     |          |
| iStroke infarct core volume                                  | 0.0 (0.0-3.2)              | 13.1 (3.9-30.4)     | 0.18 <sup>a</sup>   | 0.377    |
| RAPID infarct core volume                                    | 0.0 (0.0-0.0) <sup>b</sup> | 13.1 (3.9-30.4)     | -0.016 <sup>a</sup> | 0.939    |

a. Spearman's rank correlation

b. The range of CBF <30% was 0.0-5.0 mL in patients with posterior circulation large vessel occlusion in the RAPID software.

**Supplement Figure legend**

**Supplement Figure 1. The infarct core and hypoperfusion volumes on the two software in all patients**

**Supplement Figure 2. The infarct core volume on iStroke, the RAPID software, and ground truth in patients with DWI**
